# Supplementary material
Source: Research Square preprint supplement (doi:10.21203/rs.3.rs-9542678/v1)
Supplement: Supplementary file 1 [file 5b52350d9bf5718858b8f1fa.pdf]

## Online Appendix: Some robustness checks tables.

### B.1 a- Sample without countries with total rents exceeding 50%

| VARIABLES                                                                                                           | (1)                     | (2)                        | (3)                        |
|---------------------------------------------------------------------------------------------------------------------|-------------------------|----------------------------|----------------------------|
| Total rents (t-1)                                                                                                   | 0.802***<br>(0.126)     | 1.372***<br>(0.259)        | 1.614***<br>(0.304)        |
| Square total rents (t-1)                                                                                            | -0.861***<br>(0.237)    | -0.841***<br>(0.245)       | -0.868***<br>(0.247)       |
| Gross loans / Assets                                                                                                | 0.155***<br>(0.0241)    | 0.243***<br>(0.0293)       | 0.242***<br>(0.0292)       |
| Non-interest income/ Gross revenues                                                                                 | 0.0426***<br>(0.0163)   | 0.0380*<br>(0.0204)        | 0.0356*<br>(0.0205)        |
| Non deposits Funding / Total funding                                                                                | 0.000133<br>(0.000148)  | -0.000739***<br>(0.000235) | -0.000752***<br>(0.000235) |
| Total assets (log)                                                                                                  | -0.423<br>(0.661)       | -0.493<br>(0.661)          | -0.499<br>(0.661)          |
| Asset growth                                                                                                        | 0.0420***<br>(0.00907)  | 0.0408***<br>(0.00906)     | 0.0411***<br>(0.00906)     |
| Equity / Assets                                                                                                     | 0.0378***<br>(0.000750) | 0.0378***<br>(0.000753)    | 0.0378***<br>(0.000752)    |
| (Total rents(t-1))*(Gross loans / Assets)                                                                           |                         | -1.427***<br>(0.318)       | -1.857***<br>(0.432)       |
| (Total rents(t-1))*(Non interest income/ Gross revenues)                                                            |                         | -0.132<br>(0.209)          | -0.458<br>(0.320)          |
| (Total rents(t-1))*(Non deposits Funding / Total funding)                                                           |                         | 0.0105***<br>(0.00203)     | 0.00896**<br>(0.00377)     |
| (Total rents(t-1))*(Gross loans / Assets)*(Non deposits Funding/ Total funding)                                     |                         |                            | 0.00237<br>(0.00598)       |
| (Total rents(t-1))*(Gross loans / Assets)*(Customer deposits / Total funding)*(Non-interest income/ Gross revenues) |                         |                            | 0.683<br>(0.579)           |
| Constant                                                                                                            | 1.446***<br>(0.209)     | 1.445***<br>(0.210)        | 1.447***<br>(0.210)        |
| Observations                                                                                                        | 59,750                  | 59,750                     | 59,750                     |
| Number of BankID                                                                                                    | 7,381                   | 7,381                      | 7,381                      |
| Country FE                                                                                                          | YES                     | YES                        | YES                        |
| Year FE                                                                                                             | YES                     | YES                        | YES                        |
| R_squared                                                                                                           | 0.266                   | 0.267                      | 0.268                      |

Standard errors in parentheses: \*\*\* p<0.01, \*\* p<0.05, \* p<0.1

b- Sample without countries with total rents exceeding 40%

| VARIABLES                                                                                                              | (1)                     | (2)                        | (3)                        |
|------------------------------------------------------------------------------------------------------------------------|-------------------------|----------------------------|----------------------------|
| Total rents (t-1)                                                                                                      | 0.802***<br>(0.126)     | 1.372***<br>(0.259)        | 1.614***<br>(0.304)        |
| Square total rents (t-1)                                                                                               | -0.861***<br>(0.237)    | -0.841***<br>(0.245)       | -0.868***<br>(0.247)       |
| Gross loans / Assets                                                                                                   | 0.155***<br>(0.0241)    | 0.243***<br>(0.0293)       | 0.242***<br>(0.0292)       |
| Non-interest income/ Gross revenues                                                                                    | 0.0426***<br>(0.0163)   | 0.0380*<br>(0.0204)        | 0.0356*<br>(0.0205)        |
| Non deposits Funding / Total funding                                                                                   | 0.000133<br>(0.000148)  | -0.000739***<br>(0.000235) | -0.000752***<br>(0.000235) |
| Total assets (log)                                                                                                     | -0.423<br>(0.661)       | -0.493<br>(0.661)          | -0.499<br>(0.661)          |
| Asset growth                                                                                                           | 0.0420***<br>(0.00907)  | 0.0408***<br>(0.00906)     | 0.0411***<br>(0.00906)     |
| Equity / Assets                                                                                                        | 0.0378***<br>(0.000750) | 0.0378***<br>(0.000753)    | 0.0378***<br>(0.000752)    |
| (Total rents(t-1))*(Gross loans / Assets)                                                                              |                         | -1.427***<br>(0.318)       | -1.857***<br>(0.432)       |
| (Total rents(t-1))*(Non interest income/ Gross revenues)                                                               |                         | -0.132<br>(0.209)          | -0.458<br>(0.320)          |
| (Total rents(t-1))*(Non deposits Funding / Total funding)                                                              |                         | 0.0105***<br>(0.00203)     | 0.00896**<br>(0.00377)     |
| (Total rents(t-1))*(Gross loans / Assets)*(Non deposits Funding/<br>Total funding)                                     |                         |                            | 0.00237<br>(0.00598)       |
| (Total rents(t-1))*(Gross loans / Assets)*(Customer deposits /<br>Total funding)*(Non-interest income/ Gross revenues) |                         |                            | 0.683<br>(0.579)           |
| Constant                                                                                                               | 1.446***<br>(0.209)     | 1.445***<br>(0.210)        | 1.447***<br>(0.210)        |
| Observations                                                                                                           | 59,750                  | 59,750                     | 59,750                     |
| Number of BankID                                                                                                       | 7,381                   | 7,381                      | 7,381                      |
| Country FE                                                                                                             | YES                     | YES                        | YES                        |
| Year FE                                                                                                                | YES                     | YES                        | YES                        |
| R_squared                                                                                                              | 0.266                   | 0.267                      | 0.268                      |

Standard errors in parentheses: \*\*\* p<0.01, \*\* p<0.05, \* p<0.1

## B.2 Heterogeneity test

| VARIABLES                                              | Model 1              |                      |                      |                      | Model 2                |                      |                      |                     | Model 3                |                      |                      |                     |
|--------------------------------------------------------|----------------------|----------------------|----------------------|----------------------|------------------------|----------------------|----------------------|---------------------|------------------------|----------------------|----------------------|---------------------|
|                                                        | Oil                  | Gas                  | Coal                 | Mineral              | Oil                    | Gas                  | Coal                 | Mineral             | Oil                    | Gas                  | Coal                 | Mineral             |
| Oil_rents (t-1)                                        | 0.882***<br>(0.182)  |                      |                      |                      | 1.051***<br>(0.310)    |                      |                      |                     | 1.343***<br>(0.334)    |                      |                      |                     |
| Square oil rents (t-1)                                 | -1.100***<br>(0.320) |                      |                      |                      | -0.755**<br>(0.308)    |                      |                      |                     | -0.749**<br>(0.303)    |                      |                      |                     |
| Gas rents (t-1)                                        |                      | 3.995***<br>(1.003)  |                      |                      |                        | 4.778***<br>(1.543)  |                      |                     |                        | 6.202***<br>(1.956)  |                      |                     |
| Square gas rents (t-1)                                 |                      | -22.86***<br>(8.561) |                      |                      |                        | -22.13**<br>(9.438)  |                      |                     |                        | -22.87**<br>(9.631)  |                      |                     |
| Coal rents (t-1)                                       |                      |                      | 3.619***<br>(0.573)  |                      |                        |                      | 4.340***<br>(0.943)  |                     |                        |                      | 2.850**<br>(1.315)   |                     |
| Square coal rents (t-1)                                |                      |                      | -7.895***<br>(1.298) |                      |                        |                      | -7.231***<br>(1.536) |                     |                        |                      | -7.547***<br>(1.660) |                     |
| Mineral rents (t-1)                                    |                      |                      |                      | 2.060***<br>(0.461)  |                        |                      |                      | 2.636***<br>(0.708) |                        |                      |                      | 2.568**<br>(1.044)  |
| Square mineral rents (t-1)                             |                      |                      |                      | -9.323***<br>(2.756) |                        |                      |                      | -7.303**<br>(2.857) |                        |                      |                      | -7.541**<br>(2.933) |
| (Oil rents(t-1))*(Gross loans / Assets)                |                      |                      |                      |                      | -1.162***<br>(0.372)   |                      |                      |                     | -1.798***<br>(0.486)   |                      |                      |                     |
| (Oil rents(t-1))*(Non interest income/Gross revenues)  |                      |                      |                      |                      | -0.0480<br>(0.253)     |                      |                      |                     | -0.672*<br>(0.346)     |                      |                      |                     |
| (Oil rents(t-1))*(Non deposits Funding /Total funding) |                      |                      |                      |                      | 0.0134***<br>(0.00256) |                      |                      |                     | 0.0151***<br>(0.00460) |                      |                      |                     |
| (Gas rents(t-1))*(Gross loans / Assets)                |                      |                      |                      |                      |                        | -5.427***<br>(1.377) |                      |                     |                        | -7.554***<br>(2.252) |                      |                     |
| Gas rents(t-1))*(Non interest income/Gross revenues)   |                      |                      |                      |                      |                        | 1.614<br>(1.102)     |                      |                     |                        | -0.289<br>(2.306)    |                      |                     |
| (Gas rents(t-1))*(Non deposits Funding /Total funding) |                      |                      |                      |                      |                        | 0.0409***            |                      |                     |                        | 0.0375**             |                      |                     |

|                                                                                  |          |          |          |          |           |          |          |          |          |          |          |          |
|----------------------------------------------------------------------------------|----------|----------|----------|----------|-----------|----------|----------|----------|----------|----------|----------|----------|
| (Coal rents(t-1))*(Gross loans / Assets)                                         |          |          |          |          | (0.00850) |          |          |          |          | (0.0179) |          |          |
|                                                                                  |          |          |          |          |           |          |          |          |          |          |          |          |
|                                                                                  |          |          |          |          |           |          |          |          |          |          |          |          |
| (Coal rents(t-1))*(Non interest income/Gross revenues)                           |          |          |          |          |           |          |          |          |          |          |          |          |
|                                                                                  |          |          |          |          |           |          |          |          |          |          |          |          |
|                                                                                  |          |          |          |          |           |          |          |          |          |          |          |          |
| (Coal rents(t-1))*(Customer deposits /Total funding)                             |          |          |          |          |           |          |          |          |          |          |          |          |
|                                                                                  |          |          |          |          |           |          |          |          |          |          |          |          |
|                                                                                  |          |          |          |          |           |          |          |          |          |          |          |          |
| (Mineral rents(t-1))*(Gross loans /Assets)                                       |          |          |          |          |           |          |          |          |          |          |          |          |
|                                                                                  |          |          |          |          |           |          |          |          |          |          |          |          |
|                                                                                  |          |          |          |          |           |          |          |          |          |          |          |          |
| (Mineral rents(t-1))*(Non interest income/ Gross revenues)                       |          |          |          |          |           |          |          |          |          |          |          |          |
|                                                                                  |          |          |          |          |           |          |          |          |          |          |          |          |
|                                                                                  |          |          |          |          |           |          |          |          |          |          |          |          |
| Mineral rents(t-1))*(Non deposits Funding /Total funding)                        |          |          |          |          |           |          |          |          |          |          |          |          |
|                                                                                  |          |          |          |          |           |          |          |          |          |          |          |          |
|                                                                                  |          |          |          |          |           |          |          |          |          |          |          |          |
| (Oil rents(t-1))*(Gross loans / Assets)*(Non deposits Funding / Total funding)   |          |          |          |          |           |          |          |          |          |          |          |          |
|                                                                                  |          |          |          |          |           |          |          |          |          |          |          |          |
|                                                                                  |          |          |          |          |           |          |          |          |          |          |          |          |
| (Oil rents(t-1))*(Gross loans / Assets)*(Non-interest income/ Gross revenues)    |          |          |          |          |           |          |          |          |          |          |          |          |
|                                                                                  |          |          |          |          |           |          |          |          |          |          |          |          |
|                                                                                  |          |          |          |          |           |          |          |          |          |          |          |          |
| (Gas rents(t-1))*(Gross loans / Assets)*(Non deposits Funding / Total funding)   |          |          |          |          |           |          |          |          |          |          |          |          |
|                                                                                  |          |          |          |          |           |          |          |          |          |          |          |          |
|                                                                                  |          |          |          |          |           |          |          |          |          |          |          |          |
| (Gas rents(t-1))*(Gross loans / Assets)*(Non-interest income/ Gross revenues)    |          |          |          |          |           |          |          |          |          |          |          |          |
|                                                                                  |          |          |          |          |           |          |          |          |          |          |          |          |
|                                                                                  |          |          |          |          |           |          |          |          |          |          |          |          |
| (Coal rents(t-1))*(Gross loans / Assets)*(Non deposits Funding / Total funding)  |          |          |          |          |           |          |          |          |          |          |          |          |
|                                                                                  |          |          |          |          |           |          |          |          |          |          |          |          |
|                                                                                  |          |          |          |          |           |          |          |          |          |          |          |          |
| (Coal rents(t-1))*(Gross loans / Assets)*(Non-interest income/ Gross revenues)   |          |          |          |          |           |          |          |          |          |          |          |          |
|                                                                                  |          |          |          |          |           |          |          |          |          |          |          |          |
|                                                                                  |          |          |          |          |           |          |          |          |          |          |          |          |
| (Mineral rents(t-1))*(Gross loans/Assets)*(Non deposits Funding / Total funding) |          |          |          |          |           |          |          |          |          |          |          |          |
|                                                                                  |          |          |          |          |           |          |          |          |          |          |          |          |
|                                                                                  |          |          |          |          |           |          |          |          |          |          |          |          |
| (Mineral rents(t-1))*(Gross loans/Assets)*(Non-interest income/ Gross revenues)  |          |          |          |          |           |          |          |          |          |          |          |          |
|                                                                                  |          |          |          |          |           |          |          |          |          |          |          |          |
|                                                                                  |          |          |          |          |           |          |          |          |          |          |          |          |
| Constant                                                                         | 1.480*** | 1.476*** | 1.403*** | 1.429*** | 1.487***  | 1.488*** | 1.400*** | 1.428*** | 1.492*** | 1.488*** | 1.395*** | 1.424*** |
|                                                                                  | (0.209)  | (0.209)  | (0.209)  | (0.209)  | (0.210)   | (0.210)  | (0.209)  | (0.209)  | (0.210)  | (0.210)  | (0.210)  | (0.209)  |

|                  |        |        |        |        |        |        |        |        |        |        |        |        |
|------------------|--------|--------|--------|--------|--------|--------|--------|--------|--------|--------|--------|--------|
| Observations     | 56,612 | 56,419 | 56,641 | 56,921 | 56,612 | 56,419 | 56,641 | 56,921 | 56,612 | 56,419 | 56,641 | 56,921 |
| Number of BankID | 7,337  | 7,336  | 7,339  | 7,373  | 7,337  | 7,336  | 7,339  | 7,373  | 7,337  | 7,336  | 7,339  | 7,373  |
| Country FE       | YES    |
| Year FE          | YES    |
| R_squared        | 0.264  | 0.265  | 0.265  | 0.266  | 0.266  | 0.267  | 0.265  | 0.266  | 0.266  | 0.267  | 0.265  | 0.266  |

Standard errors in parentheses: \*\*\* p<0.01, \*\* p<0.05, \* p<0.1. Control variables have been omitted in the table.

### B.3 Alternative measures of total rents

| VARIABLES                                                       | Resource rents (mean t-5 to t-1) |           |           | Resource rents (mean t-3 to t-1) |           |           | Resource rents (t-1 fixed weights) |         |         | Resource rents (t-1 time varying weights) |         |         |
|-----------------------------------------------------------------|----------------------------------|-----------|-----------|----------------------------------|-----------|-----------|------------------------------------|---------|---------|-------------------------------------------|---------|---------|
|                                                                 | Model 1                          | Model 2   | Model 3   | Model 1                          | Model 2   | Model 3   | Model 1                            | Model 2 | Model 3 | Model 1                                   | Model 2 | Model 3 |
| Resource rents (mean t -5 to t-1)                               | -0.226                           | 0.717*    | 1.193***  |                                  |           |           |                                    |         |         |                                           |         |         |
|                                                                 | (0.258)                          | (0.390)   | (0.451)   |                                  |           |           |                                    |         |         |                                           |         |         |
| Square resource rents (mean t -5 to t-1)                        | -0.174                           | -0.0252   | 0.0275    |                                  |           |           |                                    |         |         |                                           |         |         |
|                                                                 | (0.433)                          | (0.484)   | (0.482)   |                                  |           |           |                                    |         |         |                                           |         |         |
| (Resource rents (mean t -5 to t-1))                             |                                  | -2.052*** | -2.922*** |                                  |           |           |                                    |         |         |                                           |         |         |
| *(Gross loans / Assets)                                         |                                  | (0.456)   | (0.609)   |                                  |           |           |                                    |         |         |                                           |         |         |
| (Resource rents (mean t -5 to t-1))                             |                                  | -0.218    | -0.880*   |                                  |           |           |                                    |         |         |                                           |         |         |
| *(Non interest income/ Gross rev.)                              |                                  | (0.307)   | (0.486)   |                                  |           |           |                                    |         |         |                                           |         |         |
| (Resource rents (mean t -5 to t-1))                             |                                  | 0.0113*** | 0.00816   |                                  |           |           |                                    |         |         |                                           |         |         |
| *(Non deposits Funding / Total fund.)                           |                                  | (0.00315) | (0.00505) |                                  |           |           |                                    |         |         |                                           |         |         |
| (Resource rents (mean t -5 to t-1))                             |                                  |           | 0.00473   |                                  |           |           |                                    |         |         |                                           |         |         |
| *(Gross loans / Assets) *(Non deposits Funding / Total funding) |                                  |           | (0.00816) |                                  |           |           |                                    |         |         |                                           |         |         |
| (Resource rents (mean t -5 to t-1))                             |                                  |           | 1.319     |                                  |           |           |                                    |         |         |                                           |         |         |
| *(Gross loans / Assets)*(Non-interest income/ Gross revenues)   |                                  |           | (0.866)   |                                  |           |           |                                    |         |         |                                           |         |         |
| Resource rents (mean t-3 to t-1)                                |                                  |           |           | 0.839***                         | 1.272***  | 1.568***  |                                    |         |         |                                           |         |         |
|                                                                 |                                  |           |           | (0.175)                          | (0.284)   | (0.322)   |                                    |         |         |                                           |         |         |
| Square resource rents (mean t -3 to t-1)                        |                                  |           |           | -1.075***                        | -0.864*** | -0.873*** |                                    |         |         |                                           |         |         |
|                                                                 |                                  |           |           | (0.306)                          | (0.312)   | (0.314)   |                                    |         |         |                                           |         |         |
| (Resource rents (mean t-3 tot-1))*(Gross loans/ Assets)         |                                  |           |           |                                  | -1.313*** | -1.846*** |                                    |         |         |                                           |         |         |
|                                                                 |                                  |           |           |                                  | (0.321)   | (0.447)   |                                    |         |         |                                           |         |         |
| (Resource rents (mean t-3 to t-1))                              |                                  |           |           |                                  | -0.225    | -0.653*   |                                    |         |         |                                           |         |         |
| *(Non interest income/ Gross rev.)                              |                                  |           |           |                                  | (0.238)   | (0.350)   |                                    |         |         |                                           |         |         |
| (Resource rents (mean t-3 to t-1))*                             |                                  |           |           |                                  | 0.0130*** | 0.0114*** |                                    |         |         |                                           |         |         |
| (Customer deposits / Total fund.)                               |                                  |           |           |                                  | (0.00250) | (0.00395) |                                    |         |         |                                           |         |         |
| (Res. rents (mean t-3 to t-1))                                  |                                  |           |           |                                  |           | 0.00233   |                                    |         |         |                                           |         |         |

|                                                                    |           |           |           |           |           |           |
|--------------------------------------------------------------------|-----------|-----------|-----------|-----------|-----------|-----------|
| *(Gross loans/Assets)*(Non Deposits Funding/Total Funding)         | (0.00576) |           |           |           |           |           |
| (Resource rents (mean t-3 to t-1))                                 | 0.871     |           |           |           |           |           |
| *(Gross loans / Assets)*(Non-interest income/ Gross revenues)      | (0.654)   |           |           |           |           |           |
| Resource rents (t-1 fixed weights)                                 |           | 3.439***  | 4.846***  | 5.603***  |           |           |
|                                                                    |           | (0.609)   | (1.054)   | (1.135)   |           |           |
| Square resource rents (t-1 fixed weights)                          |           | -10.25*** | -10.32*** | -10.18*** |           |           |
|                                                                    |           | (2.140)   | (2.346)   | (2.415)   |           |           |
| (Resource rents (t-1 fixed weights))                               |           |           | -4.012*** | -6.042*** |           |           |
| *(Gross loans / Assets)                                            |           |           | (1.343)   | (1.890)   |           |           |
| Resource rents (t-1 fixed weights))                                |           |           | -0.762    | -2.349**  |           |           |
| *(Non interest income/ Gross rev.)                                 |           |           | (0.790)   | (1.042)   |           |           |
| (Resource rents (t-1 fixed weights))                               |           |           | 0.0518*** | 0.0618*** |           |           |
| *(Non deposits funding / Total fund.)                              |           |           | (0.0112)  | (0.0208)  |           |           |
| (Resource rents (t-1 fixed weights))                               |           |           |           | -0.0221   |           |           |
| *(Gross loans / Assets)*(Non deposits Funding / Total funding)     |           |           |           | (0.0332)  |           |           |
| (Resource rents (t-1 fixed weights))                               |           |           |           | 5.122**   |           |           |
| *(Gross loans / Assets)*(Non-interest income/ Gross revenues)      |           |           |           | (2.521)   |           |           |
| Resource rents (t-1 time-varying weights)                          |           |           |           |           | 2.194***  | 2.798***  |
|                                                                    |           |           |           |           | (0.363)   | (0.776)   |
| Square resource rents (t-1 time varying weights)                   |           |           |           |           | -5.825*** | -5.802*** |
|                                                                    |           |           |           |           | (1.169)   | (1.225)   |
| (Resource rents (t-1 time varying weights))*(Gross loans / Assets) |           |           |           |           |           | -2.112**  |
| (Resource rents (t-1 time varying weights))                        |           |           |           |           |           | (0.981)   |
| *(Non interest income/ Gross revenues)                             |           |           |           |           |           | -0.465    |
| (Resource rents (t-1 time varying weights))                        |           |           |           |           |           | (0.702)   |
| *(Non deposits Funding / Total funding)                            |           |           |           |           |           | 0.0379*** |
| (Resource rents (t-1 time varying weights))                        |           |           |           |           |           | (0.00844) |
|                                                                    |           |           |           |           |           | (0.0175)  |
|                                                                    |           |           |           |           |           | -0.0239   |

|                                                                                                                                                                                       |                     |                     |                     |                     |                     |                     |                     |                     |                     |                     |                     |                     |                   |
|---------------------------------------------------------------------------------------------------------------------------------------------------------------------------------------|---------------------|---------------------|---------------------|---------------------|---------------------|---------------------|---------------------|---------------------|---------------------|---------------------|---------------------|---------------------|-------------------|
| *(Gross loans / Assets)*(Non deposits<br>Funding / Total Funding)<br>(Resource rents (t-1 time varying weights))<br>*(Gross loans / Assets)*(Non-interest income<br>/ Gross revenues) |                     |                     |                     |                     |                     |                     |                     |                     |                     |                     |                     |                     | (0.0277)          |
| Constant                                                                                                                                                                              | 1.051***<br>(0.240) | 1.013***<br>(0.238) | 1.019***<br>(0.237) | 1.159***<br>(0.227) | 1.173***<br>(0.227) | 1.175***<br>(0.227) | 1.472***<br>(0.209) | 1.479***<br>(0.209) | 1.480***<br>(0.209) | 1.449***<br>(0.209) | 1.460***<br>(0.210) | 1.461***<br>(0.210) | 3.839*<br>(2.098) |
| Observations                                                                                                                                                                          | 31,815              | 31,815              | 31,815              | 44,817              | 44,817              | 44,817              | 59,750              | 59,750              | 59,750              | 56,887              | 56,887              | 56,887              |                   |
| Number of BankID                                                                                                                                                                      | 5,848               | 5,848               | 5,848               | 6,818               | 6,818               | 6,818               | 7,381               | 7,381               | 7,381               | 7,372               | 7,372               | 7,372               |                   |
| Country FE                                                                                                                                                                            | YES                 |                   |
| Year FE                                                                                                                                                                               | YES                 |                   |
| R-squared                                                                                                                                                                             | 0.308               | 0.309               | 0.310               | 0.288               | 0.289               | 0.290               | 0.266               | 0.266               | 0.267               | 0.265               | 0.266               | 0.266               |                   |

Standard errors in parentheses: \*\*\* p<0.01, \*\* p<0.05, \* p<0.1

## B.4 Endogeneity issue IV regressions

| VARIABLES                                                                       | Model 1                   | Model 2                  | Model 3                   |
|---------------------------------------------------------------------------------|---------------------------|--------------------------|---------------------------|
| Total rents (t-1)                                                               | 2.819<br>(3.373)          | -5.833<br>(7.793)        | -8.198<br>(11.03)         |
| Square total rents (t-1)                                                        | -5.841<br>(14.41)         | -57.05***<br>(19.73)     | -32.62**<br>(14.25)       |
| Gross loans / Assets                                                            | 0.0717<br>(0.0659)        | -0.627<br>(0.443)        | -0.0831<br>(0.254)        |
| Non-interest income/ Gross revenues                                             | -0.946***<br>(0.0596)     | -1.694***<br>(0.430)     | -1.155***<br>(0.215)      |
| Non deposits Funding / Total funding                                            | -0.00308***<br>(0.000585) | -0.00728***<br>(0.00112) | -0.00668***<br>(0.000884) |
| Total assets (log)                                                              | 7.891***<br>(1.134)       | 13.47***<br>(1.989)      | 10.94***<br>(1.182)       |
| Asset growth                                                                    | -0.670***<br>(0.0465)     | -0.665***<br>(0.0557)    | -0.661***<br>(0.0504)     |
| Equity / Assets                                                                 | 0.0101***<br>(0.00118)    | 0.0137***<br>(0.00162)   | 0.0127***<br>(0.00134)    |
| (Total rents(t-1))*(Gross loans / Assets)                                       |                           | 17.39<br>(11.24)         | 19.29<br>(17.14)          |
| (Total rents(t-1))*(Non interest income/ Gross revenues)                        |                           | 17.12*<br>(10.13)        | 23.38<br>(16.25)          |
| (Total rents(t-1))*(Non deposits Funding / Total funding)                       |                           | 0.0338<br>(0.0308)       | 0.0550*<br>(0.0325)       |
| (Total rents(t-1))*(Gross loans / Assets)*(Non deposits Funding/ Total funding) |                           |                          | 0.00638<br>(0.0530)       |
| (Total rents(t-1))*(Gross loans / Assets)*(Non-interest income/ Gross revenues) |                           |                          | -33.29*<br>(20.19)        |
| Constant                                                                        | 1.532***<br>(0.264)       | 0.981***<br>(0.287)      | 1.093***<br>(0.257)       |
| Observations                                                                    | 36,652                    | 36,652                   | 36,652                    |
| Sanderson-Windmeijer F test : Total rents (t-1)                                 | 34.17                     | 30.16                    | 22.78                     |
| Sanderson-Windmeijer F test: Square of total rents (t-1)                        | 34.04                     | 14.96                    | 29.42                     |
| Hansen Test p-value                                                             | 0.00                      | 0.37                     | 0.10                      |

Standard errors in parentheses: \*\*\* p<0.01, \*\* p<0.05, \* p<0.1

## B.5 Controlling for bank types

| VARIABLES                                                                        | (1)                     | (2)                        | (3)                        |
|----------------------------------------------------------------------------------|-------------------------|----------------------------|----------------------------|
| Total rents (t-1)                                                                | 0.802***<br>(0.126)     | 1.374***<br>(0.259)        | 1.616***<br>(0.304)        |
| Square total rents (t-1)                                                         | -0.863***<br>(0.237)    | -0.842***<br>(0.245)       | -0.869***<br>(0.247)       |
| Gross loans / Assets                                                             | 0.153***<br>(0.0241)    | 0.241***<br>(0.0294)       | 0.240***<br>(0.0292)       |
| Non-interest income/ Gross revenues                                              | 0.0443***<br>(0.0163)   | 0.0404**<br>(0.0204)       | 0.0380*<br>(0.0206)        |
| Non deposits Funding / Total funding                                             | 0.000122<br>(0.000148)  | -0.000738***<br>(0.000235) | -0.000751***<br>(0.000236) |
| Total assets (log)                                                               | -0.193<br>(0.668)       | -0.270<br>(0.668)          | -0.276<br>(0.668)          |
| Asset growth                                                                     | 0.0416***<br>(0.00907)  | 0.0404***<br>(0.00906)     | 0.0408***<br>(0.00906)     |
| Equity / Assets                                                                  | 0.0378***<br>(0.000752) | 0.0378***<br>(0.000754)    | 0.0378***<br>(0.000754)    |
| (Total rents(t-1))*(Gross loans / Assets)                                        |                         | -1.419***<br>(0.318)       | -1.849***<br>(0.432)       |
| (Total rents(t-1))*(Non interest income/ Gross revenues)                         |                         | -0.142<br>(0.209)          | -0.470<br>(0.320)          |
| (Total rents(t-1))*(Non deposits Funding / Total funding)                        |                         | 0.0104***<br>(0.00203)     | 0.00887**<br>(0.00377)     |
| (Total rents(t-1))*(Gross loans / Assets)*(Non deposits Funding / Total funding) |                         |                            | 0.00234<br>(0.00598)       |
| (Total rents(t-1))*(Gross loans / Assets)*(Non-interest income / Gross revenues) |                         |                            | 0.685<br>(0.578)           |
| Retail Bank                                                                      | -0.0662<br>(0.0596)     | -0.0679<br>(0.0594)        | -0.0678<br>(0.0594)        |
| Universal commercial Bank                                                        | -0.270***<br>(0.0623)   | -0.264***<br>(0.0621)      | -0.264***<br>(0.0622)      |
| Wholesale Commercial Bank                                                        | -0.238**<br>(0.118)     | -0.225*<br>(0.118)         | -0.225*<br>(0.118)         |
| Constant                                                                         | 1.652***<br>(0.218)     | 1.647***<br>(0.219)        | 1.649***<br>(0.219)        |
| Observations                                                                     | 59,750                  | 59,750                     | 59,750                     |
| Number of BankID                                                                 | 7,381                   | 7,381                      | 7,381                      |
| Country FE                                                                       | YES                     | YES                        | YES                        |
| Year FE                                                                          | YES                     | YES                        | YES                        |
| R_squared                                                                        | 0.270                   | 0.271                      | 0.271                      |

Standard errors in parentheses: \*\*\* p<0.01, \*\* p<0.05, \* p<0.1
